# Supplementary material
Source: publisher figshare collection journal article supplement (https://acs.figshare.com/ndownloader/files/5895873)
Supplement: Supplementary file 1 [file 5895873]

# om990266i.cif

data_shelxl 
 
_audit_creation_method            SHELXL 
_chemical_name_systematic 
; 
 ? 
; 
_chemical_name_common             compound 1 
_chemical_formula_moiety          ? 
_chemical_formula_structural      ? 
_chemical_formula_analytical      ? 
_chemical_formula_sum             'C36 H30 Fe2 O4' 
_chemical_formula_weight          638.30 
_chemical_melting_point           ? 
_chemical_compound_source         ? 
 
loop_ 
 _atom_type_symbol 
 _atom_type_description 
 _atom_type_scat_dispersion_real 
 _atom_type_scat_dispersion_imag 
 _atom_type_scat_source 
 'C'  'C'   0.0033   0.0016 
 'International Tables Vol C Tables 4.2.6.8 and 6.1.1.4' 
 'H'  'H'   0.0000   0.0000 
 'International Tables Vol C Tables 4.2.6.8 and 6.1.1.4' 
 'O'  'O'   0.0106   0.0060 
 'International Tables Vol C Tables 4.2.6.8 and 6.1.1.4' 
 'Fe'  'Fe'   0.3463   0.8444 
 'International Tables Vol C Tables 4.2.6.8 and 6.1.1.4' 
 
_symmetry_cell_setting            ? 
_symmetry_space_group_name_H-M    ? 
 
loop_ 
 _symmetry_equiv_pos_as_xyz 
 'x, y, z' 
 '-x, y+1/2, -z+1/2' 
 '-x, -y, -z' 
 'x, -y-1/2, z-1/2' 
 
_cell_length_a                    12.997(5) 
_cell_length_b                    14.390(3) 
_cell_length_c                    16.705(8) 
_cell_angle_alpha                 90.00 
_cell_angle_beta                  91.064(2) 
_cell_angle_gamma                 90.00 
_cell_volume                      3124.0(20) 
_cell_formula_units_Z             4 
_cell_measurement_temperature     213(2) 
_cell_measurement_reflns_used     ? 
_cell_measurement_theta_min       ? 
_cell_measurement_theta_max       ? 
 
_exptl_crystal_description        ? 
_exptl_crystal_colour             ? 
_exptl_crystal_size_max           ? 
_exptl_crystal_size_mid           ? 
_exptl_crystal_size_min           ? 
_exptl_crystal_density_meas       ? 
_exptl_crystal_density_diffrn     1.357 
_exptl_crystal_density_method     ? 
_exptl_crystal_F_000              1320 
_exptl_absorpt_coefficient_mu     0.966 
_exptl_absorpt_correction_type    ? 
_exptl_absorpt_correction_T_min   ? 
_exptl_absorpt_correction_T_max   ? 
 
_exptl_special_details 
; 
 ? 
; 
 
_diffrn_ambient_temperature       213(2) 
_diffrn_radiation_wavelength      0.71070 
_diffrn_radiation_type            MoK\a 
_diffrn_radiation_source          'fine-focus sealed tube' 
_diffrn_radiation_monochromator   graphite 
_diffrn_measurement_device        ? 
_diffrn_measurement_method        ? 
_diffrn_standards_number          ? 
_diffrn_standards_interval_count  ? 
_diffrn_standards_interval_time   ? 
_diffrn_standards_decay_%         ? 
_diffrn_reflns_number             4588 
_diffrn_reflns_av_R_equivalents   0.0000 
_diffrn_reflns_av_sigmaI/netI     0.1295 
_diffrn_reflns_limit_h_min        0 
_diffrn_reflns_limit_h_max        16 
_diffrn_reflns_limit_k_min        0 
_diffrn_reflns_limit_k_max        18 
_diffrn_reflns_limit_l_min        -21 
_diffrn_reflns_limit_l_max        21 
_diffrn_reflns_theta_min          1.57 
_diffrn_reflns_theta_max          27.51 
_reflns_number_total              4588 
_reflns_number_observed           3409 
_reflns_observed_criterion        >2sigma(I) 
 
_computing_data_collection        ? 
_computing_cell_refinement        ? 
_computing_data_reduction         ? 
_computing_structure_solution     'SHELXS-86 (Sheldrick, 1990)' 
_computing_structure_refinement   'SHELXL-93 (Sheldrick, 1993)' 
_computing_molecular_graphics     ? 
_computing_publication_material   ? 
 
_refine_special_details 
; 
 Refinement on F^2^ for ALL reflections except for 0 with very negative 
F^2^ 
 or flagged by the user for potential systematic errors.  Weighted 
R-factors 
 wR and all goodnesses of fit S are based on F^2^, conventional R-factors 
R 
 are based on F, with F set to zero for negative F^2^. The observed 
criterion 
 of F^2^ > 2sigma(F^2^) is used only for calculating _R_factor_obs etc. 
and is 
 not relevant to the choice of reflections for refinement.  R-factors 
based 
 on F^2^ are statistically about twice as large as those based on F, and 
R- 
 factors based on ALL data will be even larger. 
; 
 
_refine_ls_structure_factor_coef  Fsqd  
_refine_ls_matrix_type            full 
_refine_ls_weighting_scheme 
 'calc w=1/[\s^2^(Fo^2^)+(0.1000P)^2^+0.0000P] where P=(Fo^2^+2Fc^2^)/3' 
_atom_sites_solution_primary      direct 
_atom_sites_solution_secondary    difmap 
_atom_sites_solution_hydrogens    geom 
_refine_ls_hydrogen_treatment     ? 
_refine_ls_extinction_method      none 
_refine_ls_extinction_coef        ? 
_refine_ls_number_reflns          4588 
_refine_ls_number_parameters      389 
_refine_ls_number_restraints      0 
_refine_ls_R_factor_all           0.1323 
_refine_ls_R_factor_obs           0.0857 
_refine_ls_wR_factor_all          0.1965 
_refine_ls_wR_factor_obs          0.1712 
_refine_ls_goodness_of_fit_all    1.004 
_refine_ls_goodness_of_fit_obs    1.019 
_refine_ls_restrained_S_all       1.004 
_refine_ls_restrained_S_obs       1.019 
_refine_ls_shift/esd_max          0.102 
_refine_ls_shift/esd_mean         0.002 
 
loop_ 
 _atom_site_label 
 _atom_site_type_symbol 
 _atom_site_fract_x 
 _atom_site_fract_y 
 _atom_site_fract_z 
 _atom_site_U_iso_or_equiv 
 _atom_site_thermal_displace_type 
 _atom_site_occupancy 
 _atom_site_calc_flag 
 _atom_site_refinement_flags 
 _atom_site_disorder_group 
Fe1 Fe 0.64487(9) 0.59790(7) 0.24054(8) 0.0348(3) Uani 1 d . . 
Fe2 Fe 1.89323(8) 0.25609(7) 0.53217(7) 0.0276(3) Uani 1 d . . 
O13A O 0.6518(6) 0.7843(4) 0.3083(5) 0.068(2) Uani 1 d . . 
O13B O 1.8211(5) 0.2867(4) 0.6932(4) 0.049(2) Uani 1 d . . 
O14A O 0.6781(6) 0.6392(5) 0.0721(5) 0.070(2) Uani 1 d . . 
O14B O 1.9001(6) 0.4498(4) 0.4838(4) 0.059(2) Uani 1 d . . 
C1 C 0.7868(7) 0.5857(5) 0.2611(6) 0.040(2) Uani 1 d . . 
C2 C 0.8787(6) 0.5706(5) 0.2748(5) 0.035(2) Uani 1 d . . 
C3 C 0.9766(6) 0.5432(5) 0.2936(5) 0.032(2) Uani 1 d . . 
C4 C 1.0617(6) 0.5139(5) 0.3067(6) 0.039(2) Uani 1 d . . 
C5 C 1.1549(6) 0.4770(5) 0.3237(5) 0.036(2) Uani 1 d . . 
C6 C 1.2362(6) 0.4396(5) 0.3414(5) 0.038(2) Uani 1 d . . 
C7 C 1.3244(7) 0.3976(5) 0.3644(6) 0.041(2) Uani 1 d . . 
C8 C 1.4032(7) 0.3578(5) 0.3870(5) 0.038(2) Uani 1 d . . 
C9 C 1.4922(6) 0.3178(6) 0.4145(6) 0.039(2) Uani 1 d . . 
C10 C 1.5717(7) 0.2888(5) 0.4413(6) 0.044(2) Uani 1 d . . 
C11 C 1.6680(7) 0.2650(5) 0.4714(6) 0.040(2) Uani 1 d . . 
C12 C 1.7552(6) 0.2555(5) 0.4951(5) 0.040(2) Uani 1 d . . 
C13A C 0.6483(7) 0.7115(6) 0.2783(6) 0.045(2) Uani 1 d . . 
C13B C 1.8501(6) 0.2753(5) 0.6303(5) 0.032(2) Uani 1 d . . 
C14A C 0.6651(7) 0.6263(6) 0.1394(7) 0.046(2) Uani 1 d . . 
C14B C 1.8986(7) 0.3737(6) 0.5053(6) 0.042(2) Uani 1 d . . 
C20A C 0.5974(6) 0.5209(5) 0.3397(6) 0.038(2) Uani 1 d . . 
C20B C 2.0160(6) 0.1736(5) 0.5734(5) 0.028(2) Uani 1 d . . 
C21A C 0.6324(7) 0.4585(5) 0.2807(6) 0.040(2) Uani 1 d . . 
C21B C 2.0502(6) 0.2335(5) 0.5123(5) 0.032(2) Uani 1 d . . 
C22A C 0.5730(7) 0.4702(5) 0.2100(6) 0.042(2) Uani 1 d . . 
C22B C 1.9914(6) 0.2136(5) 0.4404(5) 0.031(2) Uani 1 d . . 
C23A C 0.4963(7) 0.5407(6) 0.2262(6) 0.047(2) Uani 1 d . . 
C23B C 1.9231(6) 0.1395(5) 0.4579(5) 0.029(2) Uani 1 d . . 
C24A C 0.5116(6) 0.5701(5) 0.3066(6) 0.042(2) Uani 1 d . . 
C24B C 1.9351(6) 0.1162(4) 0.5404(5) 0.030(2) Uani 1 d . . 
C25A C 0.6381(9) 0.5301(6) 0.4238(6) 0.057(3) Uani 1 d . . 
H1 H 0.6179(35) 0.4769(19) 0.4544(10) 0.057 Uiso 1 calc R . 
H2 H 0.6106(33) 0.5853(21) 0.4476(12) 0.057 Uiso 1 calc R . 
H3 H 0.7118(9) 0.5340(36) 0.4234(6) 0.057 Uiso 1 calc R . 
C25B C 2.0611(7) 0.1689(6) 0.6566(6) 0.046(2) Uani 1 d . . 
H16 H 2.0142(17) 0.1370(30) 0.6909(8) 0.046 Uiso 1 calc R . 
H17 H 2.0726(35) 0.2307(6) 0.6764(12) 0.046 Uiso 1 calc R . 
H18 H 2.1252(19) 0.1359(29) 0.6558(7) 0.046 Uiso 1 calc R . 
C26A C 0.7167(7) 0.3883(5) 0.2923(7) 0.055(3) Uani 1 d . . 
H4 H 0.6871(8) 0.3276(7) 0.2984(33) 0.055 Uiso 1 calc R . 
H5 H 0.7566(26) 0.4036(21) 0.3394(18) 0.055 Uiso 1 calc R . 
H6 H 0.7603(25) 0.3886(26) 0.2465(15) 0.055 Uiso 1 calc R . 
C26B C 2.1377(7) 0.3018(5) 0.5185(6) 0.043(2) Uani 1 d . . 
H19 H 2.1296(21) 0.3483(20) 0.4777(19) 0.043 Uiso 1 calc R . 
H20 H 2.2017(7) 0.2697(8) 0.5115(29) 0.043 Uiso 1 calc R . 
H21 H 2.1377(23) 0.3308(25) 0.5702(12) 0.043 Uiso 1 calc R . 
C27A C 0.5809(9) 0.4134(7) 0.1353(7) 0.068(3) Uani 1 d . . 
H7 H 0.5334(35) 0.3624(26) 0.1374(18) 0.068 Uiso 1 calc R . 
H8 H 0.6497(15) 0.3898(35) 0.1311(20) 0.068 Uiso 1 calc R . 
H9 H 0.5647(46) 0.4514(13) 0.0896(7) 0.068 Uiso 1 calc R . 
C27B C 2.0075(8) 0.2547(6) 0.3605(6) 0.053(2) Uani 1 d . . 
H22 H 2.0539(32) 0.2164(21) 0.3311(13) 0.053 Uiso 1 calc R . 
H23 H 2.0363(39) 0.3158(16) 0.3666(6) 0.053 Uiso 1 calc R . 
H24 H 1.9428(10) 0.2587(33) 0.3321(13) 0.053 Uiso 1 calc R . 
C28A C 0.4098(8) 0.5683(8) 0.1708(8) 0.077(4) Uani 1 d . . 
H10 H 0.4321(17) 0.5645(41) 0.1164(8) 0.077 Uiso 1 calc R . 
H11 H 0.3892(33) 0.6308(18) 0.1823(26) 0.077 Uiso 1 calc R . 
H12 H 0.3526(19) 0.5271(29) 0.1781(28) 0.077 Uiso 1 calc R . 
C28B C 1.8524(7) 0.0934(6) 0.4000(5) 0.044(2) Uani 1 d . . 
H25 H 1.7995(22) 0.0615(28) 0.4284(6) 0.044 Uiso 1 calc R . 
H26 H 1.8902(9) 0.0496(24) 0.3687(19) 0.044 Uiso 1 calc R . 
H27 H 1.8217(29) 0.1392(7) 0.3653(19) 0.044 Uiso 1 calc R . 
C29A C 0.4443(8) 0.6370(7) 0.3493(8) 0.070(4) Uani 1 d . . 
H13 H 0.3885(28) 0.6039(9) 0.3732(32) 0.070 Uiso 1 calc R . 
H14 H 0.4172(38) 0.6818(26) 0.3119(10) 0.070 Uiso 1 calc R . 
H15 H 0.4837(14) 0.6683(31) 0.3903(25) 0.070 Uiso 1 calc R . 
C29B C 1.8811(7) 0.0389(5) 0.5823(6) 0.045(2) Uani 1 d . . 
H28 H 1.9147(25) -0.0189(7) 0.5710(25) 0.045 Uiso 1 calc R . 
H29 H 1.8108(13) 0.0360(23) 0.5639(23) 0.045 Uiso 1 calc R . 
H30 H 1.8832(34) 0.0500(19) 0.6390(6) 0.045 Uiso 1 calc R . 
 
loop_ 
 _atom_site_aniso_label 
 _atom_site_aniso_U_11 
 _atom_site_aniso_U_22 
 _atom_site_aniso_U_33 
 _atom_site_aniso_U_23 
 _atom_site_aniso_U_13 
 _atom_site_aniso_U_12 
Fe1 0.0222(6) 0.0369(5) 0.0453(8) 0.0036(5) -0.0022(5) 0.0046(5) 
Fe2 0.0222(6) 0.0310(5) 0.0295(6) 0.0006(5) -0.0039(4) 0.0035(5) 
O13A 0.073(6) 0.050(4) 0.081(6) -0.007(4) 0.004(5) 0.003(4) 
O13B 0.051(4) 0.054(3) 0.042(4) -0.004(3) 0.012(4) -0.001(3) 
O14A 0.083(6) 0.068(4) 0.059(5) 0.018(4) 0.014(5) 0.013(4) 
O14B 0.063(5) 0.040(3) 0.073(5) 0.013(3) -0.011(4) 0.003(3) 
C1 0.034(5) 0.030(4) 0.056(6) -0.004(4) -0.004(4) 0.007(3) 
C2 0.031(5) 0.035(4) 0.037(5) -0.007(3) -0.006(4) 0.004(3) 
C3 0.027(4) 0.038(4) 0.032(5) -0.004(3) -0.003(4) -0.002(3) 
C4 0.026(5) 0.037(4) 0.052(6) -0.005(4) -0.010(4) 0.005(3) 
C5 0.025(5) 0.044(4) 0.040(5) -0.005(4) -0.007(4) 0.002(3) 
C6 0.027(5) 0.045(4) 0.042(6) -0.003(4) -0.004(4) -0.001(4) 
C7 0.032(5) 0.032(3) 0.060(6) 0.005(4) -0.006(4) -0.002(4) 
C8 0.029(5) 0.042(4) 0.042(6) -0.007(4) -0.011(4) 0.001(4) 
C9 0.022(4) 0.052(4) 0.044(6) -0.006(4) -0.006(4) 0.003(4) 
C10 0.033(5) 0.038(4) 0.061(7) -0.001(4) -0.008(5) 0.003(4) 
C11 0.029(5) 0.047(4) 0.043(5) 0.003(4) 0.000(4) 0.007(4) 
C12 0.031(5) 0.040(4) 0.049(5) 0.002(4) -0.005(4) 0.007(4) 
C13A 0.032(5) 0.049(5) 0.053(6) 0.003(4) -0.003(5) 0.005(4) 
C13B 0.025(4) 0.034(4) 0.036(5) 0.003(3) 0.003(4) 0.001(3) 
C14A 0.036(5) 0.045(5) 0.057(7) 0.006(4) 0.003(5) 0.008(4) 
C14B 0.035(5) 0.050(5) 0.040(6) 0.001(4) -0.006(4) -0.003(4) 
C20A 0.025(4) 0.042(4) 0.047(6) -0.005(4) 0.004(4) -0.002(3) 
C20B 0.024(4) 0.038(4) 0.023(4) 0.002(3) -0.001(3) 0.007(3) 
C21A 0.035(5) 0.037(4) 0.047(6) 0.002(4) 0.000(4) 0.003(4) 
C21B 0.025(4) 0.033(4) 0.038(5) 0.000(3) 0.002(4) 0.002(3) 
C22A 0.037(5) 0.043(4) 0.045(6) 0.003(4) -0.002(5) -0.007(4) 
C22B 0.022(4) 0.037(4) 0.035(5) -0.004(3) -0.002(4) 0.006(3) 
C23A 0.027(5) 0.062(5) 0.051(7) 0.014(4) -0.006(5) -0.002(4) 
C23B 0.023(4) 0.041(4) 0.024(4) 0.001(3) -0.007(3) 0.001(3) 
C24A 0.017(4) 0.045(4) 0.065(7) 0.003(4) 0.002(4) 0.007(3) 
C24B 0.024(4) 0.028(3) 0.038(5) 0.002(3) 0.005(4) 0.007(3) 
C25A 0.063(7) 0.057(5) 0.052(7) -0.007(4) -0.003(6) -0.002(5) 
C25B 0.042(6) 0.046(4) 0.048(6) 0.004(4) -0.006(5) 0.002(4) 
C26A 0.050(6) 0.037(4) 0.079(8) 0.010(5) 0.014(6) 0.007(4) 
C26B 0.034(5) 0.048(4) 0.047(6) 0.000(4) -0.004(4) -0.010(4) 
C27A 0.061(7) 0.071(6) 0.073(8) -0.012(6) 0.013(6) -0.023(6) 
C27B 0.062(7) 0.056(5) 0.042(5) 0.001(5) 0.006(5) -0.009(5) 
C28A 0.025(5) 0.107(8) 0.099(10) 0.026(7) -0.027(6) -0.004(6) 
C28B 0.037(5) 0.051(5) 0.042(5) -0.006(4) -0.009(4) -0.007(4) 
C29A 0.045(6) 0.058(5) 0.109(10) 0.005(6) 0.037(7) 0.012(5) 
C29B 0.044(6) 0.038(4) 0.055(6) 0.007(4) 0.010(5) 0.004(4) 
 
_geom_special_details 
; 
 All esds (except the esd in the dihedral angle between two l.s. planes) 
 are estimated using the full covariance matrix.  The cell esds are taken 
 into account individually in the estimation of esds in distances, angles 
 and torsion angles; correlations between esds in cell parameters are 
only 
 used when they are defined by crystal symmetry.  An approximate 
(isotropic) 
 treatment of cell esds is used for estimating esds involving l.s. 
planes. 
; 
 
loop_ 
 _geom_bond_atom_site_label_1 
 _geom_bond_atom_site_label_2 
 _geom_bond_distance 
 _geom_bond_site_symmetry_2 
 _geom_bond_publ_flag 
Fe1 C13A 1.753(9) . ? 
Fe1 C14A 1.763(11) . ? 
Fe1 C1 1.878(9) . ? 
Fe1 C20A 2.096(9) . ? 
Fe1 C23A 2.109(9) . ? 
Fe1 C24A 2.110(9) . ? 
Fe1 C22A 2.119(8) . ? 
Fe1 C21A 2.122(8) . ? 
Fe2 C14B 1.752(8) . ? 
Fe2 C13B 1.764(9) . ? 
Fe2 C12 1.888(8) . ? 
Fe2 C24B 2.089(6) . ? 
Fe2 C20B 2.095(7) . ? 
Fe2 C21B 2.098(8) . ? 
Fe2 C22B 2.103(8) . ? 
Fe2 C23B 2.127(8) . ? 
O13A C13A 1.161(10) . ? 
O13B C13B 1.134(10) . ? 
O14A C14A 1.155(12) . ? 
O14B C14B 1.154(10) . ? 
C1 C2 1.231(11) . ? 
C2 C3 1.363(11) . ? 
C3 C4 1.201(11) . ? 
C4 C5 1.348(11) . ? 
C5 C6 1.216(11) . ? 
C6 C7 1.346(11) . ? 
C7 C8 1.227(11) . ? 
C8 C9 1.363(11) . ? 
C9 C10 1.194(11) . ? 
C10 C11 1.384(12) . ? 
C11 C12 1.200(11) . ? 
C20A C21A 1.415(12) . ? 
C20A C24A 1.423(11) . ? 
C20A C25A 1.497(13) . ? 
C20B C21B 1.415(11) . ? 
C20B C24B 1.439(10) . ? 
C20B C25B 1.499(11) . ? 
C21A C22A 1.409(12) . ? 
C21A C26A 1.501(11) . ? 
C21B C22B 1.440(11) . ? 
C21B C26B 1.505(11) . ? 
C22A C23A 1.451(13) . ? 
C22A C27A 1.497(13) . ? 
C22B C23B 1.422(11) . ? 
C22B C27B 1.478(12) . ? 
C23A C24A 1.420(14) . ? 
C23A C28A 1.496(12) . ? 
C23B C24B 1.424(11) . ? 
C23B C28B 1.478(10) . ? 
C24A C29A 1.491(12) . ? 
C24B C29B 1.497(11) . ? 
 
loop_ 
 _geom_angle_atom_site_label_1 
 _geom_angle_atom_site_label_2 
 _geom_angle_atom_site_label_3 
 _geom_angle 
 _geom_angle_site_symmetry_1 
 _geom_angle_site_symmetry_3 
 _geom_angle_publ_flag 
C13A Fe1 C14A 97.2(4) . . ? 
C13A Fe1 C1 90.2(4) . . ? 
C14A Fe1 C1 91.9(4) . . ? 
C13A Fe1 C20A 102.4(4) . . ? 
C14A Fe1 C20A 158.7(4) . . ? 
C1 Fe1 C20A 96.2(4) . . ? 
C13A Fe1 C23A 115.0(4) . . ? 
C14A Fe1 C23A 97.7(4) . . ? 
C1 Fe1 C23A 151.4(3) . . ? 
C20A Fe1 C23A 66.5(3) . . ? 
C13A Fe1 C24A 90.2(4) . . ? 
C14A Fe1 C24A 133.2(4) . . ? 
C1 Fe1 C24A 134.4(4) . . ? 
C20A Fe1 C24A 39.6(3) . . ? 
C23A Fe1 C24A 39.3(4) . . ? 
C13A Fe1 C22A 154.6(4) . . ? 
C14A Fe1 C22A 92.4(4) . . ? 
C1 Fe1 C22A 112.9(3) . . ? 
C20A Fe1 C22A 66.2(3) . . ? 
C23A Fe1 C22A 40.1(3) . . ? 
C24A Fe1 C22A 66.4(4) . . ? 
C13A Fe1 C21A 140.3(4) . . ? 
C14A Fe1 C21A 122.4(4) . . ? 
C1 Fe1 C21A 86.2(3) . . ? 
C20A Fe1 C21A 39.2(3) . . ? 
C23A Fe1 C21A 65.9(3) . . ? 
C24A Fe1 C21A 65.6(3) . . ? 
C22A Fe1 C21A 38.8(3) . . ? 
C14B Fe2 C13B 95.8(4) . . ? 
C14B Fe2 C12 87.8(4) . . ? 
C13B Fe2 C12 89.4(4) . . ? 
C14B Fe2 C24B 159.3(4) . . ? 
C13B Fe2 C24B 100.2(3) . . ? 
C12 Fe2 C24B 105.2(3) . . ? 
C14B Fe2 C20B 126.7(4) . . ? 
C13B Fe2 C20B 92.1(3) . . ? 
C12 Fe2 C20B 145.0(3) . . ? 
C24B Fe2 C20B 40.2(3) . . ? 
C14B Fe2 C21B 93.8(4) . . ? 
C13B Fe2 C21B 119.9(4) . . ? 
C12 Fe2 C21B 150.3(4) . . ? 
C24B Fe2 C21B 66.9(3) . . ? 
C20B Fe2 C21B 39.4(3) . . ? 
C14B Fe2 C22B 93.8(4) . . ? 
C13B Fe2 C22B 158.5(3) . . ? 
C12 Fe2 C22B 110.2(4) . . ? 
C24B Fe2 C22B 66.8(3) . . ? 
C20B Fe2 C22B 66.8(3) . . ? 
C21B Fe2 C22B 40.1(3) . . ? 
C14B Fe2 C23B 127.1(4) . . ? 
C13B Fe2 C23B 136.9(3) . . ? 
C12 Fe2 C23B 89.3(3) . . ? 
C24B Fe2 C23B 39.5(3) . . ? 
C20B Fe2 C23B 66.4(3) . . ? 
C21B Fe2 C23B 66.2(3) . . ? 
C22B Fe2 C23B 39.3(3) . . ? 
C2 C1 Fe1 175.3(7) . . ? 
C1 C2 C3 172.7(8) . . ? 
C4 C3 C2 175.5(9) . . ? 
C3 C4 C5 176.8(9) . . ? 
C6 C5 C4 176.3(9) . . ? 
C5 C6 C7 177.3(10) . . ? 
C8 C7 C6 178.1(9) . . ? 
C7 C8 C9 176.9(9) . . ? 
C10 C9 C8 175.1(9) . . ? 
C9 C10 C11 173.8(9) . . ? 
C12 C11 C10 171.7(9) . . ? 
C11 C12 Fe2 173.3(7) . . ? 
O13A C13A Fe1 175.5(9) . . ? 
O13B C13B Fe2 178.9(8) . . ? 
O14A C14A Fe1 175.9(8) . . ? 
O14B C14B Fe2 176.5(9) . . ? 
C21A C20A C24A 107.7(8) . . ? 
C21A C20A C25A 126.7(8) . . ? 
C24A C20A C25A 125.5(8) . . ? 
C21A C20A Fe1 71.4(5) . . ? 
C24A C20A Fe1 70.7(5) . . ? 
C25A C20A Fe1 126.2(6) . . ? 
C21B C20B C24B 108.0(7) . . ? 
C21B C20B C25B 125.0(7) . . ? 
C24B C20B C25B 126.9(7) . . ? 
C21B C20B Fe2 70.4(4) . . ? 
C24B C20B Fe2 69.6(4) . . ? 
C25B C20B Fe2 127.8(6) . . ? 
C22A C21A C20A 109.3(7) . . ? 
C22A C21A C26A 125.2(9) . . ? 
C20A C21A C26A 125.5(9) . . ? 
C22A C21A Fe1 70.5(5) . . ? 
C20A C21A Fe1 69.4(5) . . ? 
C26A C21A Fe1 128.1(6) . . ? 
C20B C21B C22B 108.2(7) . . ? 
C20B C21B C26B 126.5(8) . . ? 
C22B C21B C26B 125.2(7) . . ? 
C20B C21B Fe2 70.2(4) . . ? 
C22B C21B Fe2 70.2(5) . . ? 
C26B C21B Fe2 128.6(5) . . ? 
C21A C22A C23A 107.1(8) . . ? 
C21A C22A C27A 126.0(8) . . ? 
C23A C22A C27A 126.6(9) . . ? 
C21A C22A Fe1 70.7(5) . . ? 
C23A C22A Fe1 69.5(5) . . ? 
C27A C22A Fe1 129.6(7) . . ? 
C23B C22B C21B 107.6(7) . . ? 
C23B C22B C27B 125.8(8) . . ? 
C21B C22B C27B 126.3(7) . . ? 
C23B C22B Fe2 71.2(5) . . ? 
C21B C22B Fe2 69.8(5) . . ? 
C27B C22B Fe2 129.7(6) . . ? 
C24A C23A C22A 107.5(8) . . ? 
C24A C23A C28A 126.7(9) . . ? 
C22A C23A C28A 125.5(10) . . ? 
C24A C23A Fe1 70.4(5) . . ? 
C22A C23A Fe1 70.3(5) . . ? 
C28A C23A Fe1 130.0(7) . . ? 
C22B C23B C24B 108.5(7) . . ? 
C22B C23B C28B 125.8(8) . . ? 
C24B C23B C28B 125.7(7) . . ? 
C22B C23B Fe2 69.5(4) . . ? 
C24B C23B Fe2 68.8(4) . . ? 
C28B C23B Fe2 128.2(6) . . ? 
C23A C24A C20A 108.3(8) . . ? 
C23A C24A C29A 124.9(9) . . ? 
C20A C24A C29A 126.7(9) . . ? 
C23A C24A Fe1 70.3(5) . . ? 
C20A C24A Fe1 69.7(5) . . ? 
C29A C24A Fe1 128.5(6) . . ? 
C23B C24B C20B 107.7(6) . . ? 
C23B C24B C29B 125.7(7) . . ? 
C20B C24B C29B 126.3(8) . . ? 
C23B C24B Fe2 71.7(4) . . ? 
C20B C24B Fe2 70.1(4) . . ? 
C29B C24B Fe2 128.5(6) . . ? 
 
_refine_diff_density_max    0.288 
_refine_diff_density_min   -0.508 
_refine_diff_density_rms    0.078 
